# Supplementary material
Source: Royal Society of Chemistry journal article supplement (doi:10.1039/d5py01192b)
Supplement: d5py01192b1.pdf [file d5py01192b1.pdf]

## Supporting Information

# Synthesis of a phosphorus-containing nickel(II) complex towards suppressing heat release and enhancing fire safety of polyamide 6

*Yanlu Sun*<sup>a, b\*</sup>, *Huazhao Zhang*<sup>a</sup>, *Zhouzhou Du*<sup>a</sup>, *Ke Liu*<sup>a, b</sup>, *Wenxing Chen*<sup>a, b</sup>, *Wangyang Lu*<sup>a, b\*</sup>

<sup>a</sup> State Key Laboratory of Bio-based Fiber Materials, Zhejiang Sci-Tech University, Hangzhou 310018, China.

<sup>b</sup> Zhejiang Provincial Innovation Center of Advanced Textile Technology, Shaoxing 312000, China.

E-mail: sunyanlu@zstu.edu.cn and luwy@zstu.edu.cn

### Table of Contents

|                                                                           |    |
|---------------------------------------------------------------------------|----|
| 1. Characterization -----                                                 | S2 |
| 2. Number average molecular weights of PA6 and PA6/BPMNi composites ----- | S5 |
| 3. Raman spectra of the char residues of PA6 and PA6/BPMNi-3 -----        | S5 |
| 4. Py-GC/MS results of PA6 and PA6/BPMNi-3 -----                          | S5 |

## 1. Characterization

Nuclear magnetic resonance (NMR) measurements including the  $^1\text{H}$  NMR of BPM and BPMNi, as well as  $^{31}\text{P}$  NMR of DOPO, BPM and BPMNi were evaluated using an Avance 3HD 600 MHz NMR spectrometer (Bruker Co., Switzerland). DMSO- $d_6$  was chosen as the deuterated solvent.

Mass spectrum (MS) of BPM was recorded via a Bruker auto flex maX MALDI-TOF (Bruker Co., Germany).

Ultraviolet-visible (UV-Vis) absorption spectra of BPM and BPMNi were recorded on a Shimadzu UV 3600 Plus spectrometer.

Element contents of carbon (C), hydrogen (H) and nitrogen (N) in BPM and BPMNi were performed by a Vario EL III elemental analyzer (Elemental Co., Germany). Phosphorus (P) and nickel (Ni) elements were collected by an Avio200-ICP-OES inductively coupled plasma atomic emission spectroscopy (Perkin Elmer Co., America). Each sample was measured in 3 independent replicates.

Thermal gravimetric analysis (TGA) and corresponding differential thermogravimetric (DTG) curves of BPM, BPMNi, PA6 and PA6/BPMNi composites were determined with METTLER TOLEDO TGA 2 instrument (METTLER TOLEDO Co., Switzerland). About 5 mg of the sample was heated from 30 to 700 °C with a heating rate of 10 °C·min<sup>-1</sup> under nitrogen and air atmosphere, respectively.

Differential scanning calorimetry (DSC) curves were conducted on a Perkin Elmer 4000 thermal analysis instrument (PerkinElmer Co., America) to investigate the melt-crystallization performance of PA6 and PA6/BPMNi composites. About 5 mg of the sample was heated from 30 to 280 °C and then kept at this temperature for 3 min to eliminate the thermal history. Then, the

sample was cooled to -50 °C and finally reheated to 280 °C at a rate of 10 °C·min<sup>-1</sup>.

Degree of crystallinity ( $X_c$ ) of PA6 and PA6/BPMNi composites was determined by using the following equation:

$$X_c = \Delta H_m / \Delta H_0 \quad (1)$$

where  $\Delta H_m$  is the melting enthalpy of the sample and  $\Delta H_0$  (190.6 J·g<sup>-1</sup>)<sup>1</sup> was the melting enthalpy of fully crystalline PA6.

Relative viscosity ( $\eta_r$ ) of sample was measured by employing an Ubbelohde viscometer according to ISO 307 standard. Each measurement was performed in 3 independent replicates. 0.5 g sample was dissolved in 50 mL sulfuric acid with concentration of 96%, and the flowability of the prepared solution was measured at 25.00 ± 0.01 °C. Number average molecular weight ( $M_n$ ) of sample was determined by the following empirical equation:<sup>2</sup>

$$M_n = (\eta_r - 1) \times 11500 \quad (2)$$

Limiting oxygen index (LOI) tests of PA6 and PA6/BPMNi composites were carried out on a Zr-1 instrument (Shanfang Instrument Co., China) according to ASTM D2863. Each test was performed in 5 independent replicates, and the specimen size was 115 × 10 × 4 mm<sup>3</sup>.

Vertically burning test (UL-94) of PA6 and PA6/BPMNi composites were implemented by a CFZ-II burning tester (Jiangning Analysis Instrument Co., China) according to ASTM D3801. Each test was conducted in 5 independent replicates with a dimensional size of 125 × 13 × 3.2 mm<sup>3</sup>.

Cone calorimetric measurements of PA6 and PA6/BPMNi composites were tested by a Fire Testing Technology cone calorimeter (FTT Co., England) according to ISO 5660 at a heat flux of 50 kW·m<sup>-2</sup>. Each measurement was performed in 3 independent replicates, and the sample was prepared with a square geometry of 100 × 100 × 3 mm<sup>3</sup>.

Thermogravimetric analysis-infrared spectrometry (TG-IR) measurement of PA6/BPMNi-3 was collected on a NETZSCH STA 449F5 analyzer (NETZSCH Co., Germany). About 5 mg sample was heated from 30 to 800 °C under a nitrogen atmosphere at a rate of 10 °C·min<sup>-1</sup>. The temperatures of the transfer line and gas cell were both set at 260 °C.

Pyrolysis-gas chromatography/mass spectrometry (Py-GC/MS) tests of PA6 and PA6/BPMNi-3 at the pyrolysis temperature of 700 °C were performed on a Shimadzu GC/MS-QP-2010 Ultra spectrometer (Shimadzu Co., Japan).

Scanning electron microscopy (SEM) images of the char residues images of PA6/BPMNi-3 after the cone calorimetric tests were performed through a VEGA3 TESCAN GMH/GMU instrument (TESCAN Co., Czech Republic).

Raman spectroscopies of the residual chars after the cone calorimetric tests of PA6 and PA6/BPMNi-3 were conducted on a DXR2 Raman spectrometer (Thermo Fisher Scientific Co., America) with a 532 nm laser line.

X-ray photoelectron spectroscopy (XPS) measurements of the residues after the cone calorimetric tests of PA6/BPMNi-3 were performed using an Escalab 250Xi spectrometer (Thermo Fisher Scientific Co., America) equipped with Al-K $\alpha$  excitation radiation ( $h\nu = 1361.0$  eV).

## 2. Number average molecular weights of PA6 and PA6/BPMNi composites

**Table S1** Relative viscosities ( $\eta_r$ s) and number average molecular weights ( $M_n$ s) of PA6 and PA6/BPMNi composites.

| Samples     | $\eta_r$ | $M_n$ (g·mol <sup>-1</sup> ) |
|-------------|----------|------------------------------|
| PA6         | 2.7      | $2.0 \times 10^4$            |
| PA6/BPMNi-1 | 2.6      | $1.8 \times 10^4$            |
| PA6/BPMNi-2 | 2.6      | $1.8 \times 10^4$            |
| PA6/BPMNi-3 | 2.5      | $1.7 \times 10^4$            |

## 3. Raman spectra of the char residues of PA6 and PA6/BPMNi-3

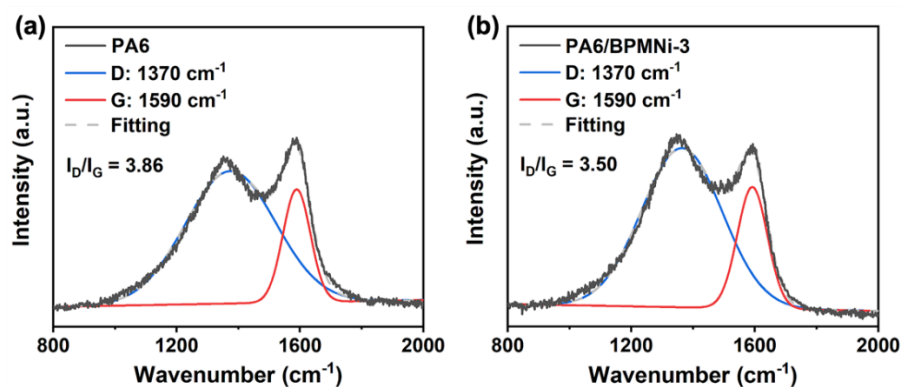

**Figure S1** Raman spectra of the char residues of (a) PA6 and (b) PA6/BPMNi-3.

## 4. Py-GC/MS results of PA6 and PA6/BPMNi-3

**Table S2** Possible pyrolytic compounds of PA6 during heating at 700 °C.

| Peak | Retention Time (min) | m/z | Compounds <sup>a</sup>                                                                |
|------|----------------------|-----|---------------------------------------------------------------------------------------|
| 1    | 1.70                 | 44  | CO <sub>2</sub>                                                                       |
| 2    | 4.84                 | 84  | 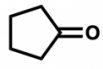 |
| 3    | 6.01                 | 95  |  |
| 4    | 6.33                 | 97  |  |

|    |       |     |                                                                                       |
|----|-------|-----|---------------------------------------------------------------------------------------|
| 5  | 11.88 | 113 | 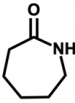   |
| 6  | 17.46 | 197 |    |
| 7  | 20.67 | 226 |    |
| 8  | 4.23  | 87  |    |
| 9  | 7.00  | 94  |    |
| 10 | 10.07 | 85  |   |
| 11 | 22.01 | 227 |  |

<sup>a</sup>Data come from NIST11s.library.

**Table S3** Possible pyrolytic compounds of PA6/BPMNi-3 during heating at 700 °C.

| Peak | Retention Time (min) | m/z | Compounds <sup>a</sup>                                                                |
|------|----------------------|-----|---------------------------------------------------------------------------------------|
| 1    | 1.77                 | 44  | CO <sub>2</sub>                                                                       |
| 2    | 4.87                 | 84  |  |
| 3    | 6.14                 | 95  |  |
| 4    | 6.36                 | 97  |  |

|    |       |     |                                                                                     |
|----|-------|-----|-------------------------------------------------------------------------------------|
| 5  | 12.01 | 113 | 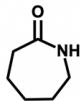 |
| 6  | 17.50 | 197 |  |
| 7  | 20.63 | 226 |  |
| 12 | 12.59 | 154 |  |

<sup>a</sup>Data come from NIST11s.library.

## REFERENCES

1. K. Liu, Y. Li, L. Tao and R. Xiao, *RSC Advances*, 2018, **8**, 9261-9271.
2. S. Zhang, X. Fan, C. Xu, P. Ji, C. Wang and H. Wang, *Polymer*, 2020, **207**, 122890.
